# Supplementary material for: Protein-stabilized Ir nanoparticles with usual charge-selective peroxidase properties
Source: Royal Society of Chemistry journal article supplement (doi:10.1039/d1tb01532j), 2021-01-01
Supplement: d1tb01532j1.pdf [file d1tb01532j1.pdf]

## **Supplementary Information**

### **Protein-stabilized Ir nanoparticles with usual charge selective peroxidase property**

Guangxia Jin, Chan Wang, Guoxia Ran, Shanhao Hao, Qijun Song\*

Key Laboratory of Synthetic and Biological Colloids, Ministry of Education,  
School of Chemical and Material Engineering, Jiangnan University, 1800 Lihu  
Road, Wuxi, Jiangsu Province 214122, P. R. China

\* Corresponding Author. E-mail address: [qsong@jiangnan.edu.cn](mailto:qsong@jiangnan.edu.cn) (Qijun Song)

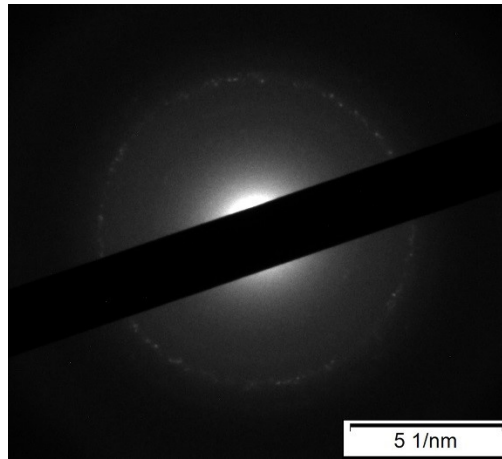

Fig.S1 Selected area electron diffraction pattern of BSA-IrNPs.

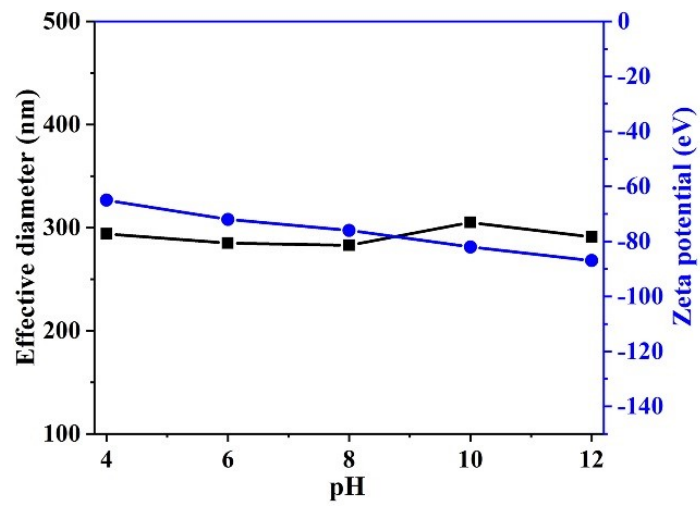

Fig.S2 Effects of pH on the stability of BSA-IrNPs in 0.2 M BR buffer solution.

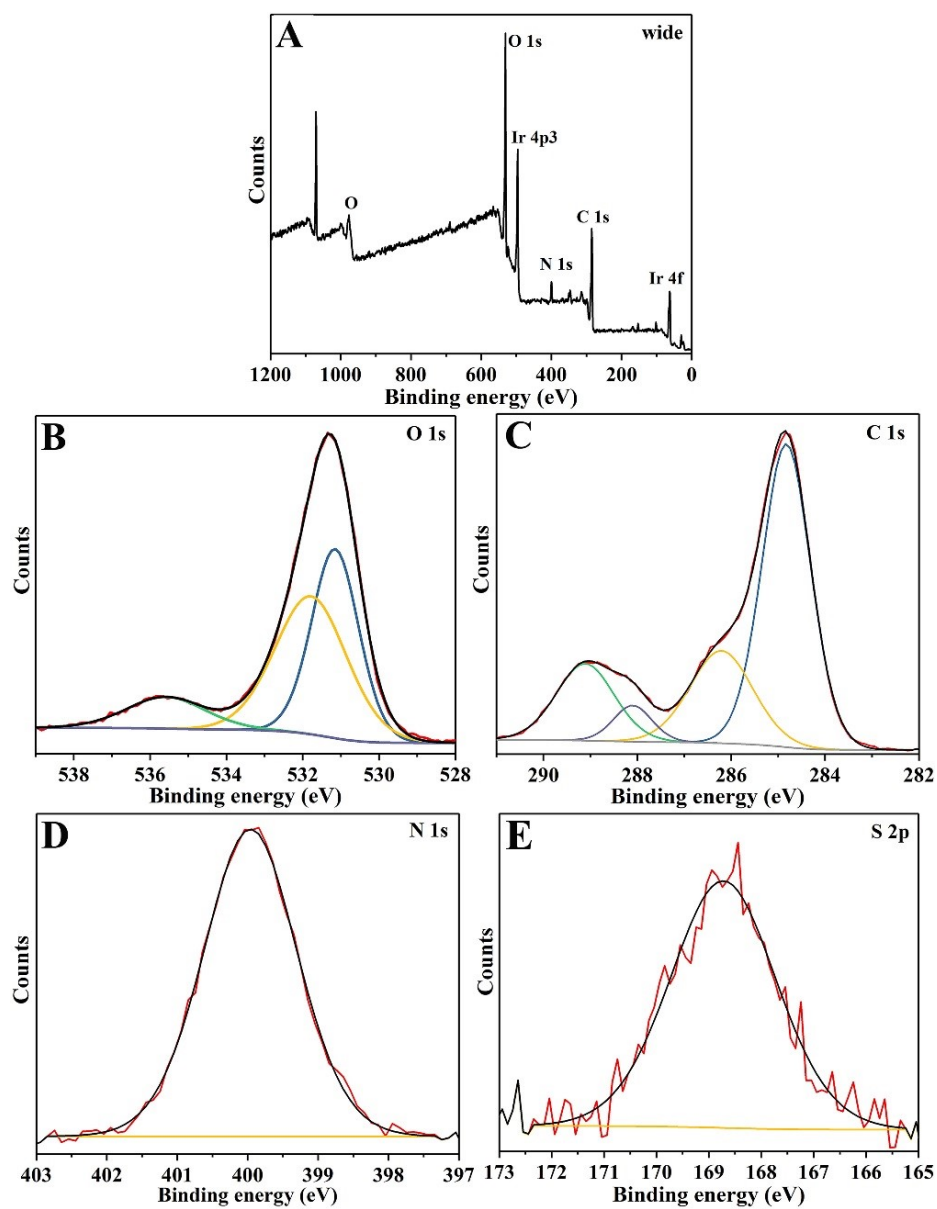

Fig. S3 XPS analysis of the BSA-IrNPs: (A) survey scan, (B) O species, (C) C species, (D) N species and (E) S species.

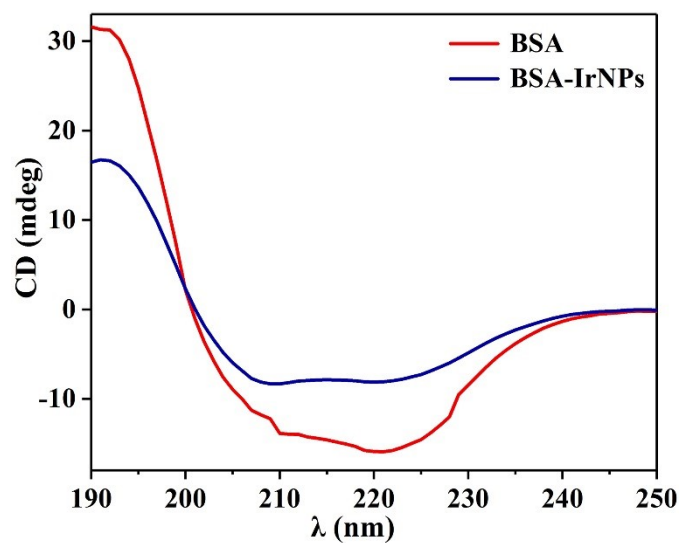

Fig.S4 Circular dichroism spectra of BSA and BSA-IrNPs.

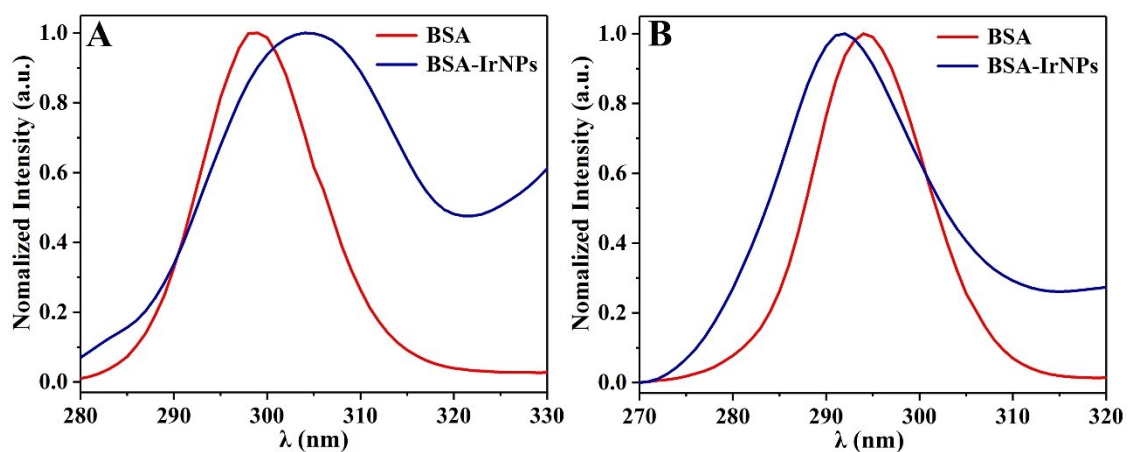

Fig.S5 Synchronous fluorescence spectra of BSA in the presence BSA-IrNPs and BSA at  $\Delta\lambda=15$  nm (A) and  $\Delta\lambda=60$  nm (B).

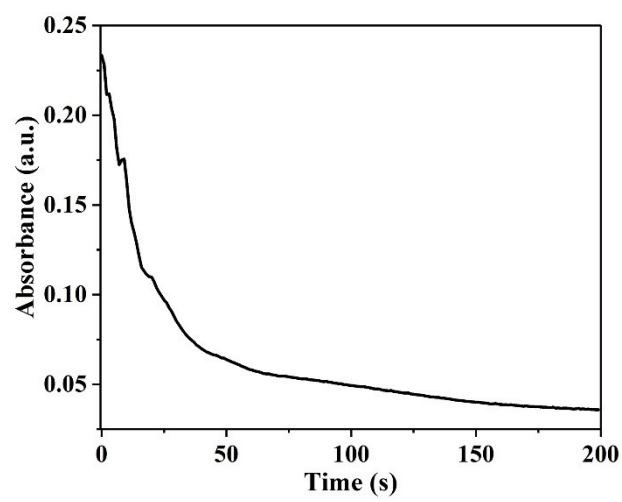

Fig.S6 Time-dependent absorbance changes at 652 nm of TMB over BSA-IrNPs and  $H_2O_2$  at room temperature and pH 3.65.

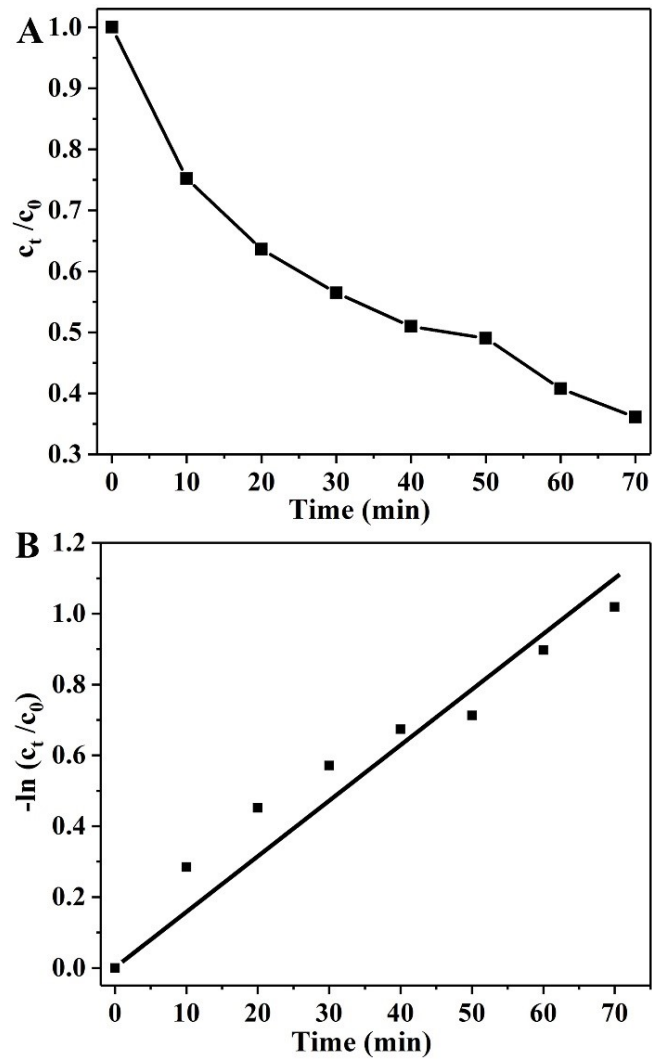

Fig.S7 Time profiles  $c_t/c_0$  (A) and  $\ln(c_t/c_0)$  (B) for BSA-IrNPs in RhB degradation at room temperature.

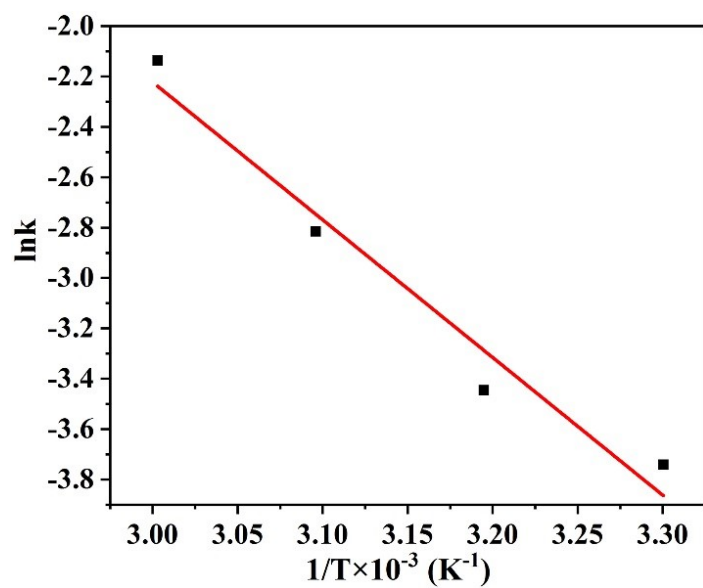

Fig.S8 Effect of reaction temperature on the RhB degradation rate in BSA-IrNPs/H<sub>2</sub>O<sub>2</sub> system.

Table S1 The activation energy ( $E_a$ ) of different nanozymes

| nanozymes                                                            | $E_a$ (kJ·mol <sup>-1</sup> ) |
|----------------------------------------------------------------------|-------------------------------|
| nano-Co <sub>3</sub> O <sub>4</sub>                                  | 61.96                         |
| Co <sub>3</sub> O <sub>4</sub> -CoFe <sub>2</sub> O <sub>4</sub> NPs | 40.73                         |
| Co <sub>3</sub> O <sub>4</sub> -SBA15                                | 56.45                         |
| Co <sub>3</sub> O <sub>4</sub> -KIT6                                 | 51.93                         |
| BSA-IrNPs                                                            | 35.71                         |

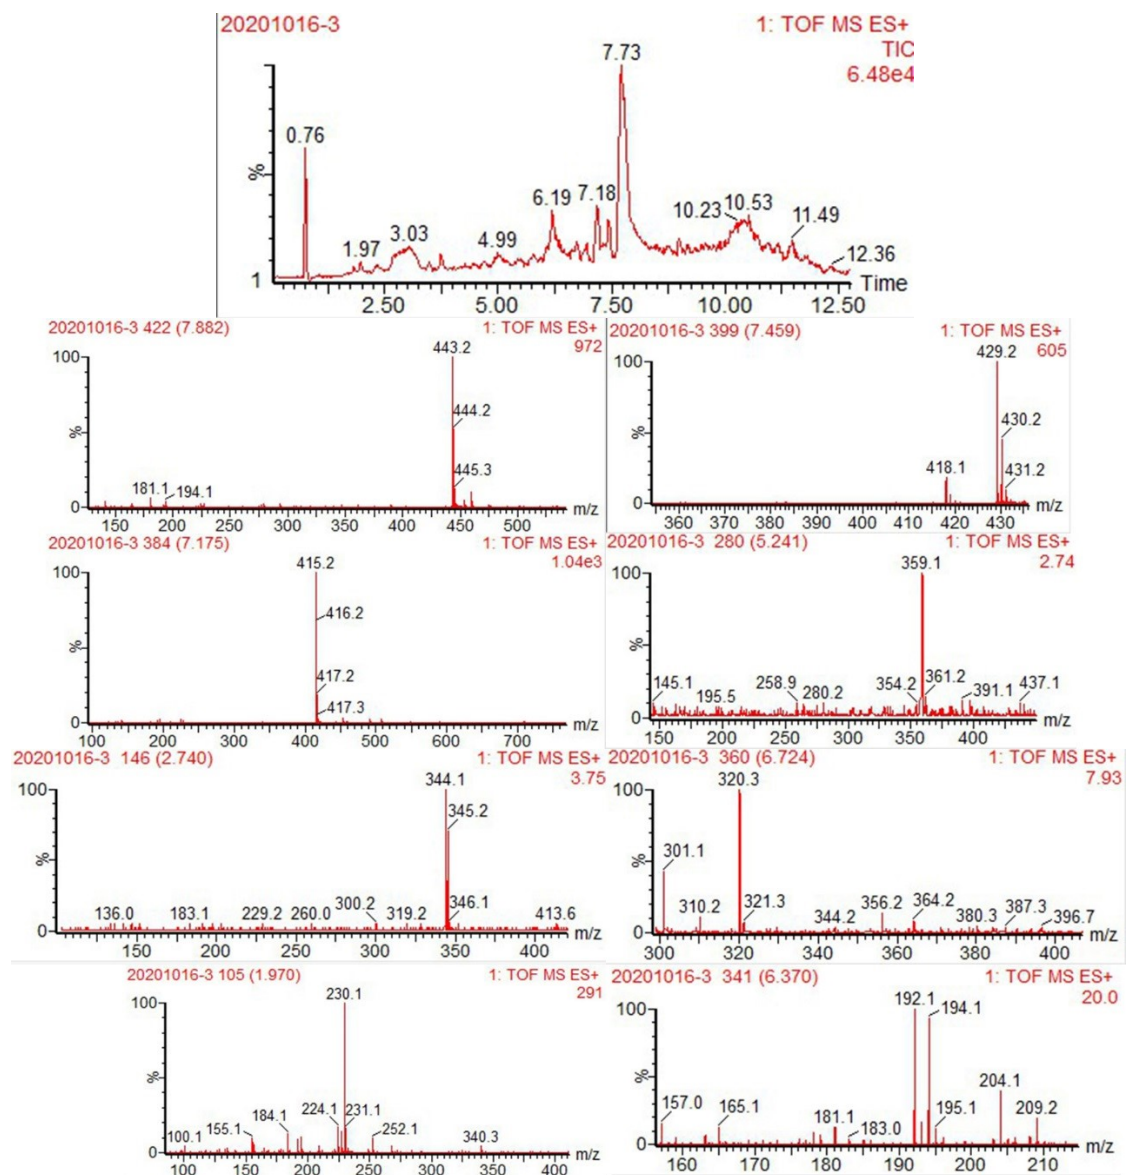

Fig.S9 LC-MS analysis of the intermediates for RhB degradation and the mass spectra of the detected intermediates.



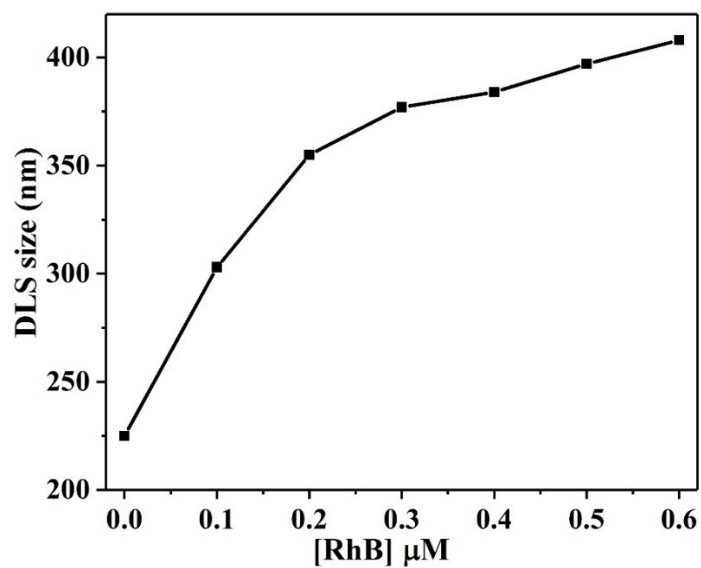

Fig.S10 The DLS sizes of BSA-IrNPs with the increase of RhB. The concentration of BSA-IrNPs was fixed at 0.03 mg/mL.

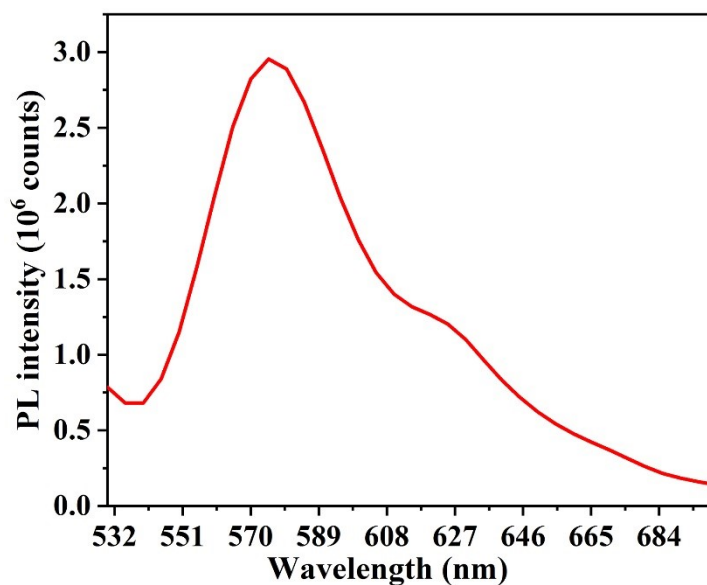

Fig.S11 PL emission spectrum of the BSA-IrNPs powder. Before the detection, the BSA-IrNPs were incubated in RhB solution (0.1 mg/mL) for 6 hours. After that, the product was collected by removing the supernatant liquid and washing with ethanol for three times. Then, the powders were obtained after drying in vacuum at 45°C for 12 h

Table S2 LC-MS information about main fragment ions of identified degradation intermediates of RhB.

| product | compounds                                                                           | RT/min | m/z |
|---------|-------------------------------------------------------------------------------------|--------|-----|
| P1      | 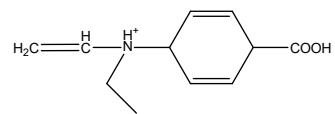   | 6.37   | 192 |
| P2      |    | 1.97   | 230 |
| P3      |    | 7.93   | 320 |
| P4      |    | 2.74   | 344 |
| P5      |   | 7.459  | 429 |
| P6      |  | 5.241  | 359 |
| P7      |  | 7.175  | 415 |
| RhB     |  | 7.882  | 443 |

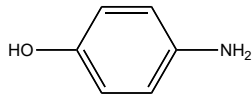

**p-aminophenol**

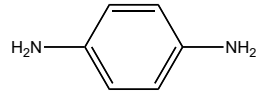

**p-phenylenediamine**

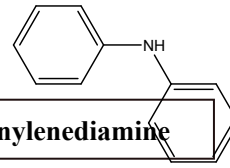

**diphenylamine**

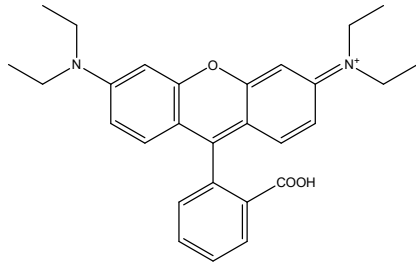

**Rhodamine B**

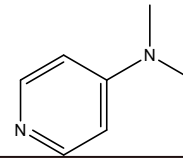

**4-dimethylaminopyridine**

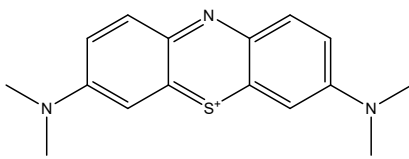

**methylene blue**

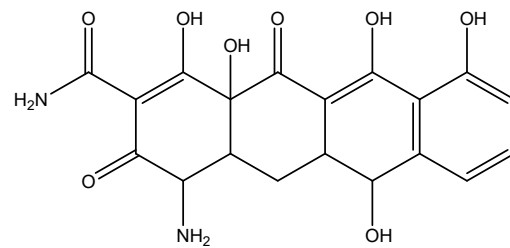

**tetracycline hydrochloride**

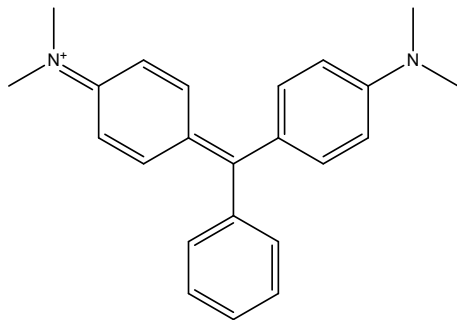

**malachite green**

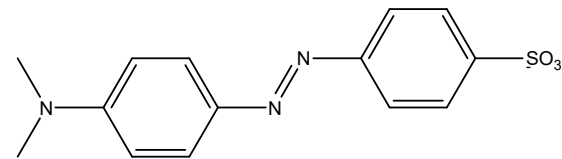

**methyl orange**

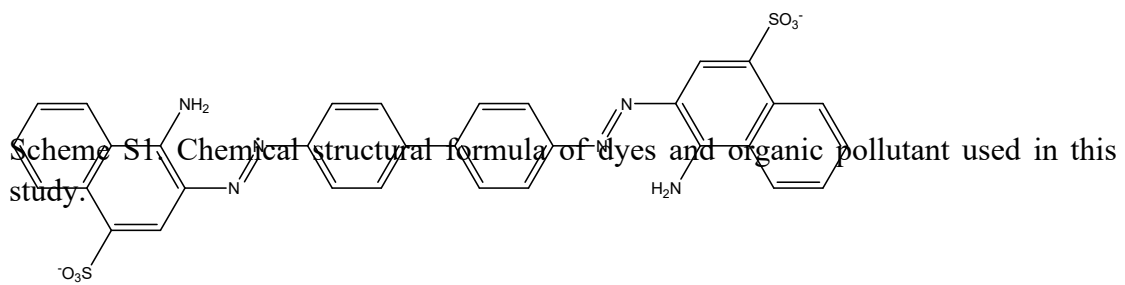

**Congo red**
